# Supplementary material for: PyMT-1099, a versatile murine cell model for EMT in breast cancer
Source: PubMed Central journal article supplement (PMC6092323; doi:10.1038/s41598-018-30640-1), 2018-08-14
Supplement: 41598_2018_30640_MOESM1_ESM.pdf [file 41598_2018_30640_MOESM1_ESM.pdf]

## Supplementary Information

### **PyMT-1099, a versatile murine cell model for EMT in breast cancer**

Meera Saxena\*, Ravi Kiran Reddy Kalathur, Melanie Neutzner, and Gerhard Christofori\*

Department of Biomedicine, University of Basel, Mattenstrasse 28, 4058 Basel, Switzerland

\*Corresponding authors: Meera Saxena and Gerhard Christofori  
Department of Biomedicine  
University of Basel  
Mattenstrasse 28  
4058 Basel  
Switzerland  
E-mails: [gerhard.christofori@unibas.ch](mailto:gerhard.christofori@unibas.ch)  
[meera.saxena@unibas.ch](mailto:meera.saxena@unibas.ch)

Co-authors' e-mail addresses:

Ravi Kiran Reddy Kalathur: [ravikiranreddy.kalathur@unibas.ch](mailto:ravikiranreddy.kalathur@unibas.ch)

Melanie Neutzner: [melanie.neutzner@unibas.ch](mailto:melanie.neutzner@unibas.ch)

## Supplementary Figures

### Figure S1

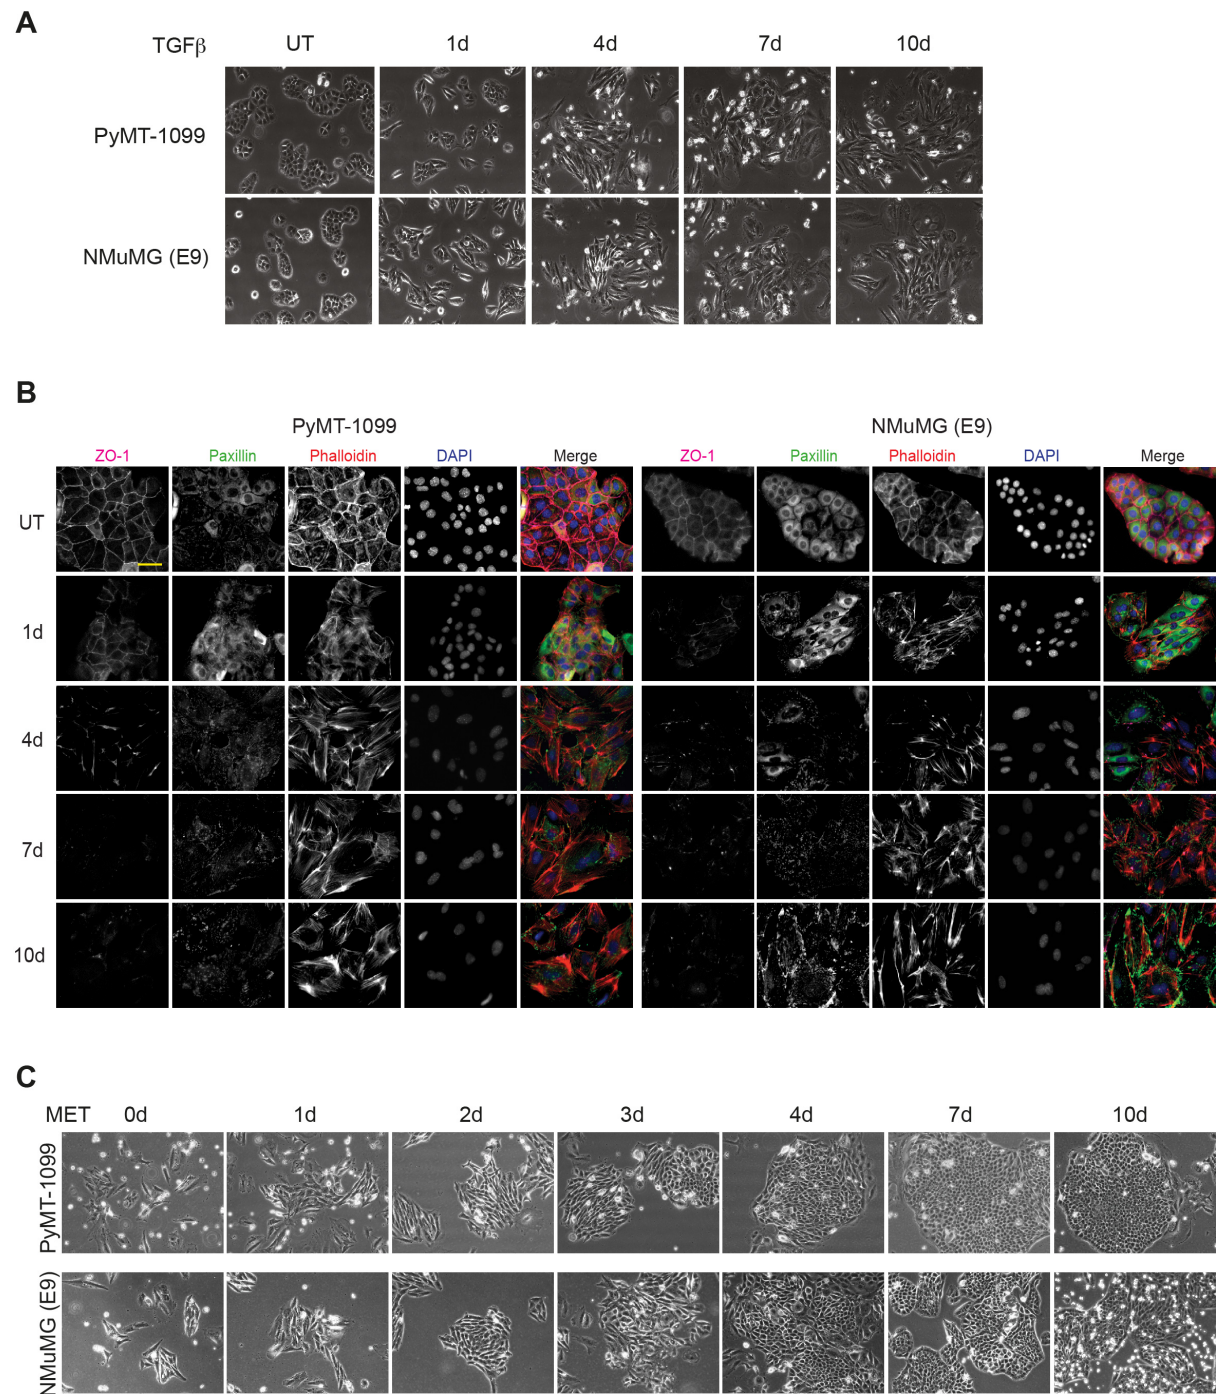

**Figure S1 (relates to Figure 2). Time course of a TGF $\beta$ -induced EMT and MET in PyMT-1099 and in NMuMG cells.**

PyMT-1099 and NMuMG (E9) cells were in parallel treated with TGF $\beta$  for 0 (UT), 1, 4, 7 or 10 days. For MET, TGF $\beta$  was withdrawn from 10 days treated cells, and monitored for EMT reversal at the indicated time-points.

**(A)** Photomicrographs represent the morphology of PyMT-1099 and NMuMG (E9) undergoing a TGF $\beta$ -induced EMT. Magnification, 10 X.

**(B)** Immunofluorescence analysis was performed to assess the expression and/or localization of EMT markers ZO-1, focal adhesions (Paxillin) and actin stress fibers (Phalloidin); n=3. DAPI was used as a nuclear counterstain. Scale bar, 50  $\mu$ m.

**(C)** Photomicrographs represent the morphology of PyMT-1099 and NMuMG (E9) undergoing MET upon TGF $\beta$  withdrawal. Magnification, 10 X.

**Figure S2**

**A**

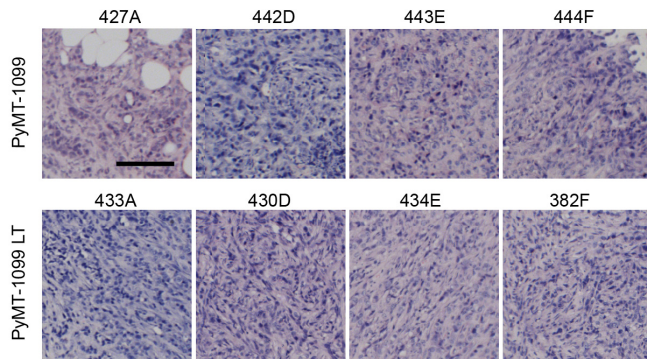

**B**

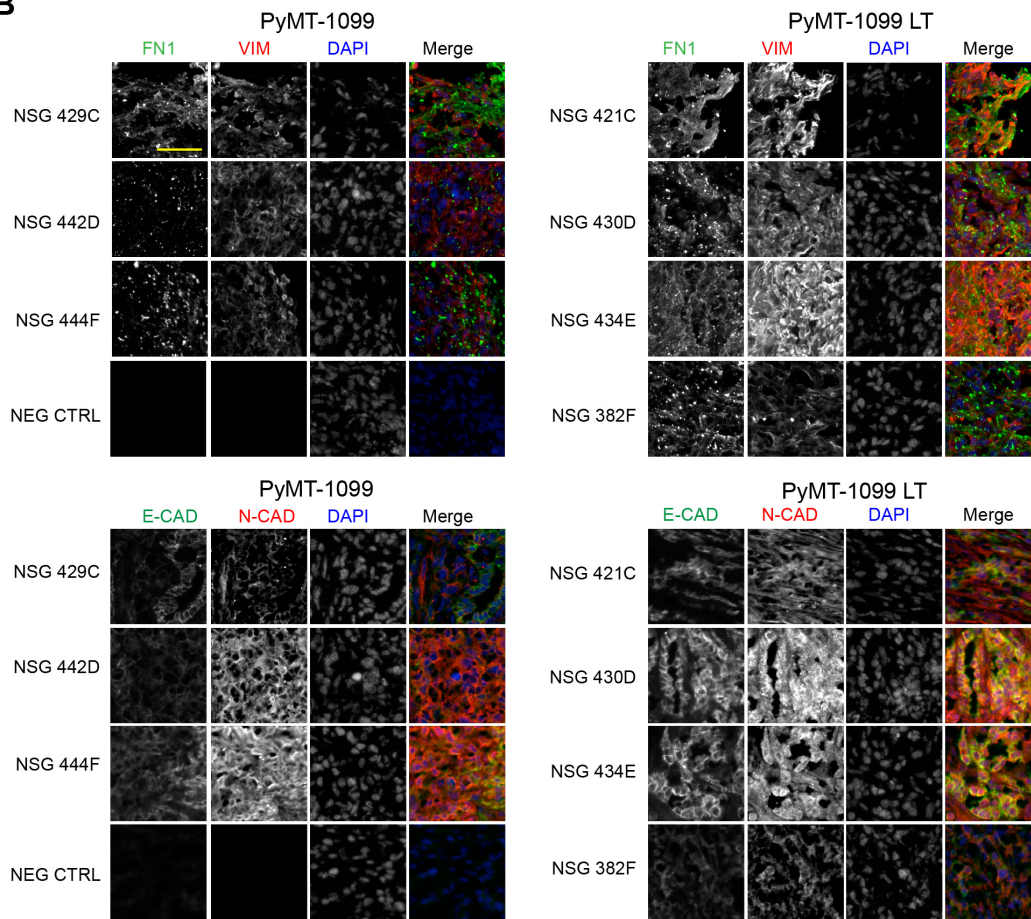

**C**

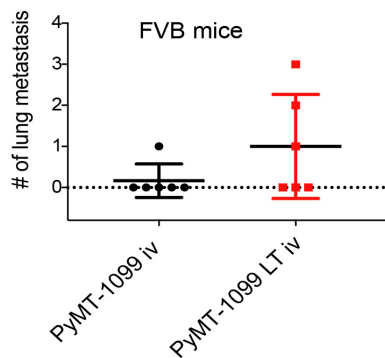

**Figure S2 (relates to Figure 4). Histology and EMT marker expression in primary tumors of PyMT-1099 and PyMT-1099 LT cells.**

**(A)** Untreated PyMT-1099 and PyMT-1099 LT cells were injected orthotopically into the mammary fat pads of NSG mice. H&E pictures represent the histology of primary tumors resected from NSG mice bearing tumors formed by PyMT-1099 or PyMT-1099 LT cells from the experiment described in Figure 4A. Representative pictures are shown from tumors of 4 out of the 6 mice used in the experiment.

**(B)** Immunofluorescence analysis was performed to assess the expression of the EMT markers FN1, VIM, E-CAD and N-CAD in tumors formed by PyMT-1099 or PyMT-1099 LT cells in NSG mice from the experiment described in Figure 4A. DAPI was used as a nuclear counterstain. Representative pictures are shown from tumors of 2 out of the 6 mice used in the experiment. Scale bar, 100 $\mu$ m.

**(C)** The graph represents the number of lung metastases formed in FVB/N mice injected with PyMT-1099 or PyMT-1099 LT cells through the tail vein; n=6. The mice were sacrificed 8 weeks post-injection and the lungs were resected for analysis of cancer cell colonization/metastatic outgrowth.

**Figure S3**

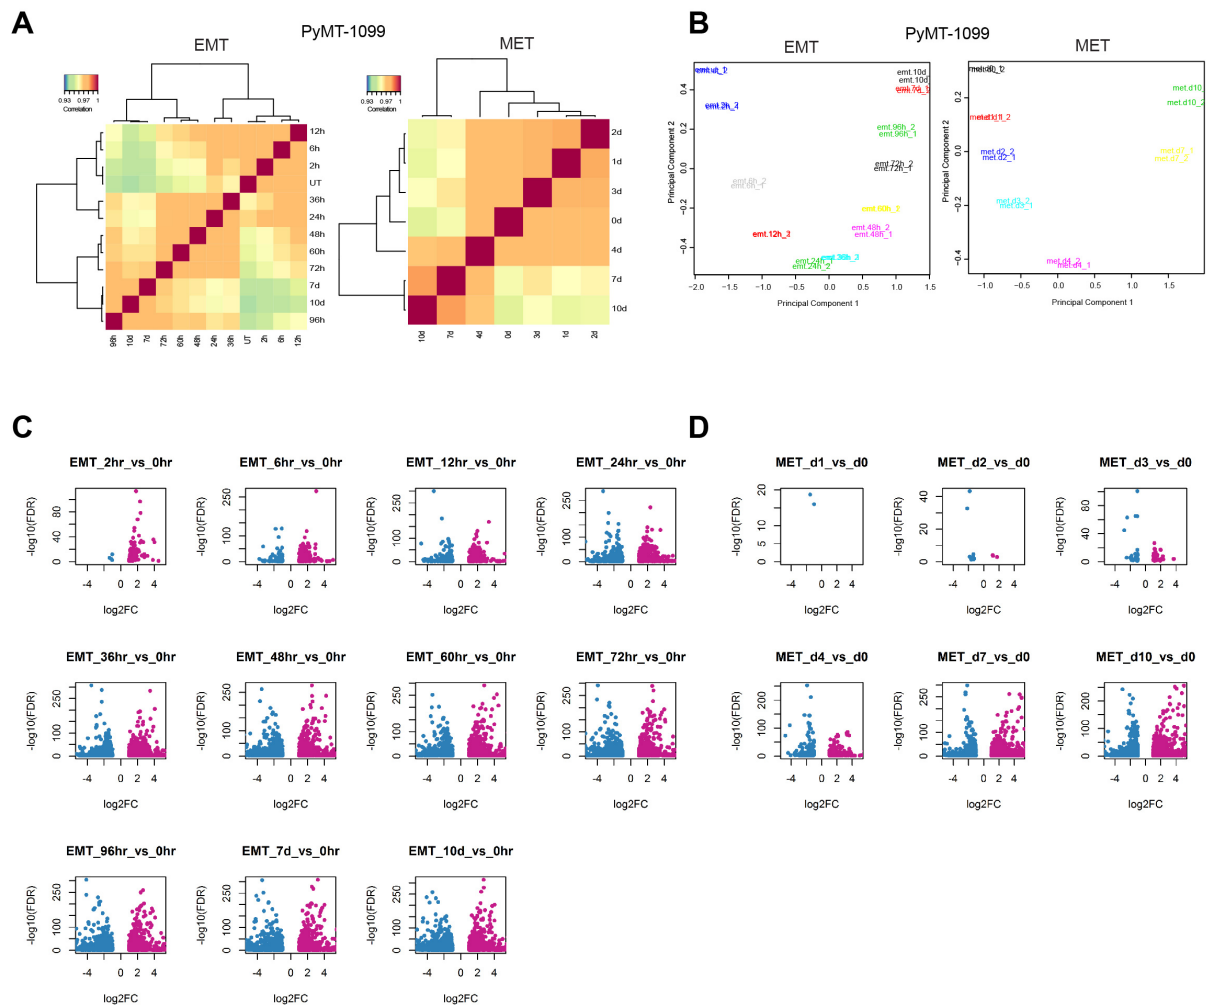

**Figure S3 (relates to Figure 5). Gene expression analysis of time courses of EMT and MET in PyMT-1099 cells.**

(A) The heatmaps represent the correlation analysis of the biological duplicates of RNA samples from the TGFβ EMT time course and the MET time course in PyMT-1099 cells that were subjected to RNA-Seq.

(B) Shown is the PCA analysis of the RNA samples from the TGFβ EMT time course and the MET time course in PyMT-1099 cells.

(C) Volcano plots depict the differentially regulated genes at each time point of TGFβ treatment of PyMT-1099 cells during EMT.

(D) Volcano plots depict the differentially regulated genes at each time point of PyMT-1099 cells during MET upon TGFβ withdrawal.

**Figure S4**

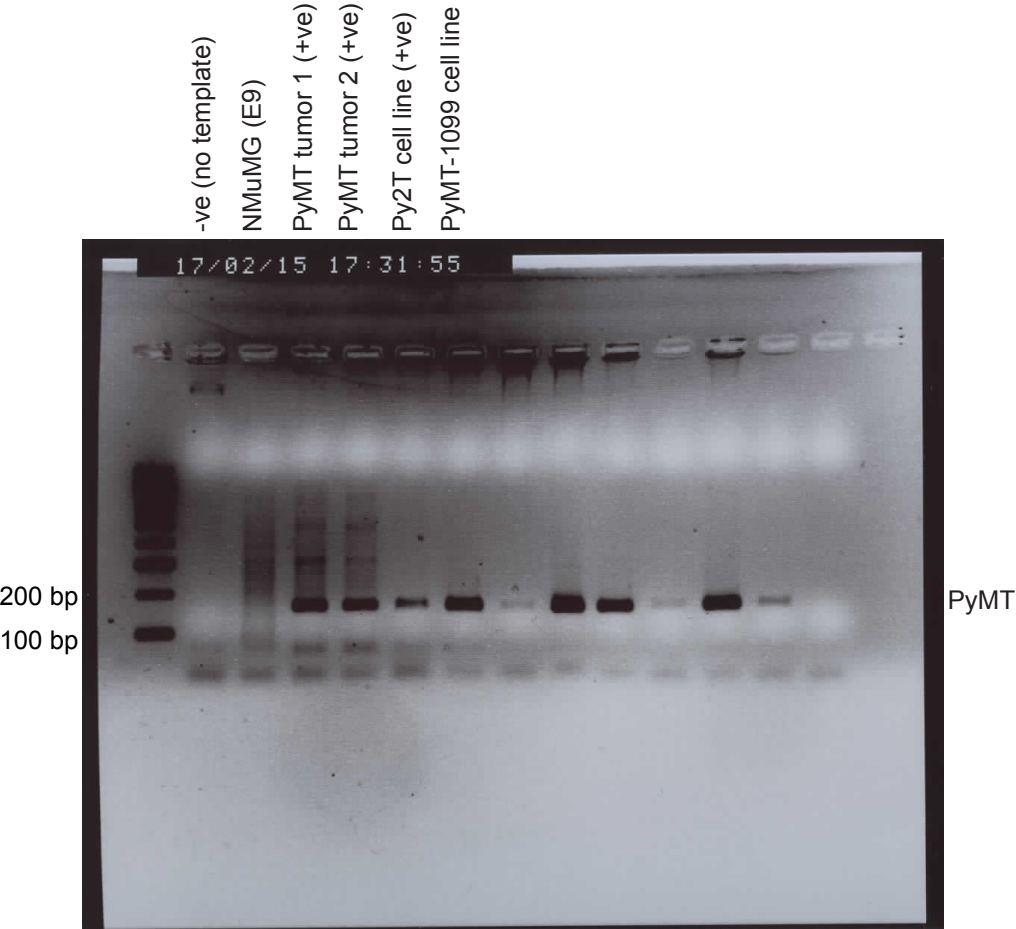

**Figure S4.** Source data- Uncropped scans from the genotyping PCR (agarose gel) presented in main Fig. 1

**Figure S5**

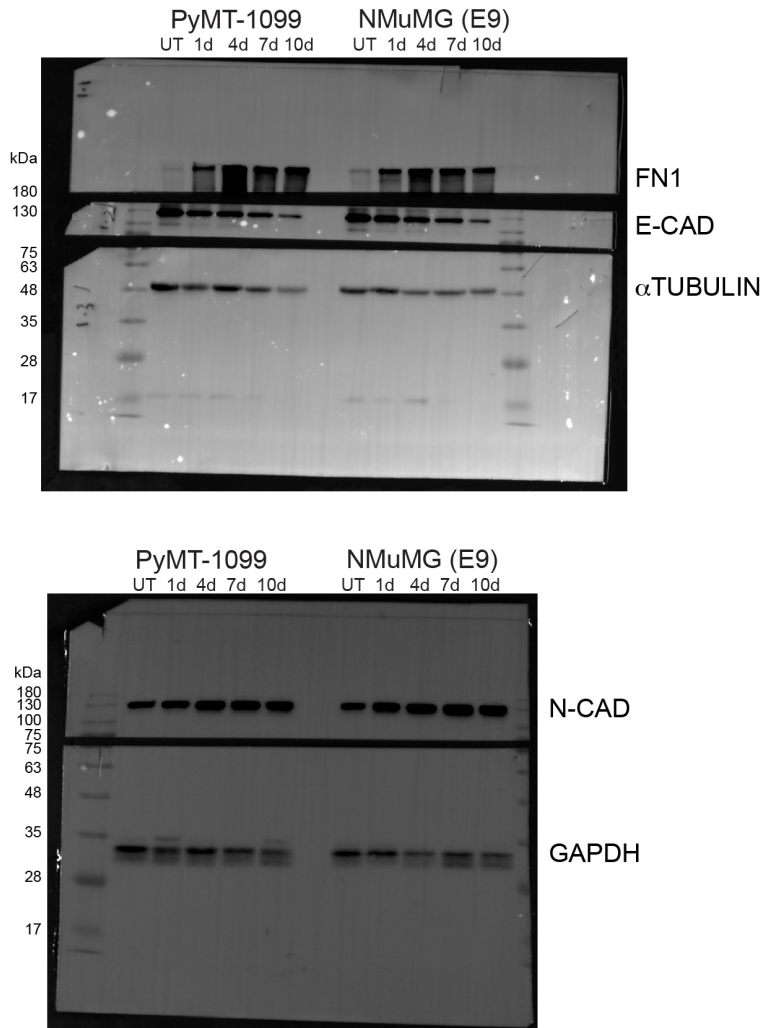

**Figure S5.** Source data- Uncropped scans from the immunoblotting results presented in main Fig. 2



**Table S1**

| <b>For genotyping</b> |                        |                        |
|-----------------------|------------------------|------------------------|
|                       | <b>Forward (5'-3')</b> | <b>Reverse (5'-3')</b> |
| PyMT transgene        | CGGCGGAGCGAGGAACTGAGG  | TCAGAAGACTCGGCAGTCTTAG |
| <b>For qPCRs</b>      |                        |                        |
| Cdh1                  | CGACCCTGCCTCTGAATCC    | TACACGCTGGGAAACATGAGC  |
| Cdh2                  | CAATGACGTCCACCCTGTTCT  | CTGCCATGACTTTCTACGGAGA |
| Fn1                   | CCCAGACTTATGGTGGCAATT  | AATTTCCGCCTCGAGTCTGA   |
| Ncam                  | CAGGAGTCCTTGAATTCAT    | TGGAGAAGACGGTGTGTCTG   |
